# Supplementary material for: Tuning Sensitivity of CAR to EGFR Density Limits Recognition of Normal Tissue While Maintaining Potent Antitumor Activity
Source: Oxford University Press journal article supplement (doi:10.1158/0008-5472.can-15-0139), 2015-08-31
Supplement: 00085472can150139-sup-143964_1_supp_2947967_nn6tlz.docx [file 00085472can150139-sup-143964_1_supp_2947967_nn6tlz.docx]

| **Antigen** | **Clone** | **Vendor** |
| --- | --- | --- |
| CD3 | SK7 | BD Biosciences |
| CD4 | RPA-T4 | BD Biosciences |
| CD8 | SK1 | BD Biosciences |
| CD19 | HIB19 | BD Biosciences |
| CD27 | L128 | BD Biosciences |
| CD28 | L293 | BD Biosciences |
| CD45RA | HI100 | BD Biosciences |
| CD45RO | UCHL1 | BD Biosciences |
| CD56 | B159 | BD Biosciences |
| CD62L | DREG-56 | BD Biosciences |
| CCR7 | GD43H7 | Biolegend |
| EGFR | EGFR.1 | BD Biosciences |
| Fc (to detect CAR) | HI10104 | Invitrogen |
| TNF-α | mAb11 | BD Biosciences |
| IFN-γ | 27 | BD Biosciences |
| Ki-67 | B56 | BD Biosciences |
| EGFR Blocking | LA1 | Millipore |

**Supplementary Table S1.** Antibodies used in study.
