# Supplementary material for: Tuning Sensitivity of CAR to EGFR Density Limits Recognition of Normal Tissue While Maintaining Potent Antitumor Activity
Source: Oxford University Press journal article supplement (doi:10.1158/0008-5472.can-15-0139), 2015-08-31
Supplement: 00085472can150139-sup-143964_1_supp_2947968_nn6tlv.docx [file 00085472can150139-sup-143964_1_supp_2947968_nn6tlv.docx]

| Donor | Cetux-CAR  %CD4 | Cetux-CAR  %CD8 | Cetux-CAR  Ratio (CD4/CD8) | Nimo-CAR  %CD4 | Nimo-CAR  %CD8 | Nimo-CAR  Ratio (CD4/CD8) |
| --- | --- | --- | --- | --- | --- | --- |
| 1 | 46.7 | 42.9 | 1.09 | 18.8 | 73.1 | 0.26 |
| 2 | 83.0 | 17.3 | 4.80 | 88.4 | 1.2 | 12.3 |
| 3 | 2.5 | 96.2 | 0.03 | 0.4 | 97.9 | 0.01 |
| 4 | 62.0 | 24.9 | 2.49 | 38.7 | 48.8 | 0.79 |
| 5 | 35.5 | 47.6 | 0.75 | 20.8 | 57.6 | 0.36 |
| 6 | 78.5 | 17.1 | 4.59 | 82.3 | 11.3 | 7.29 |
| 7 | 44.0 | 49.2 | 0.89 | 31.9 | 60.1 | 0.53 |

**Supplementary Table S2.** Ratio of CD4 and CD8 on Cetux-CAR+ and Nimo CAR+ T cells. Expression of CD4 and CD8 in Cetux-CAR+ and Nimo-CAR+ T cells after 28 days of numeric expansion was determined by flow cytometry. Data from 7 independent donors. Statistical analyses of CD4/CD8 ratios performed by two-tailed student’s t-test.
